# Supplementary material for: Metabolomic changes in the mouse retina after optic nerve injury
Source: PubMed Central journal article supplement (PMC6085332; doi:10.1038/s41598-018-30464-z), 2018-08-09
Supplement: 41598_2018_30464_MOESM1_ESM.pdf [file 41598_2018_30464_MOESM1_ESM.pdf]

**<Title>**

Metabolomic changes in the mouse retina after optic nerve injury

**<Authors>**

Kota Sato<sup>1,2,a</sup>, Daisuke Saigusa<sup>3,4,5,a</sup>, Ritsumi Saito<sup>3,4</sup>, Amane Fujioka<sup>1</sup>, Yurika Nakagawa<sup>1</sup>, Koji M Nishiguchi<sup>6</sup>, Taiki Kokubun<sup>1</sup>, Ikuko N. Motoike<sup>3,7</sup>, Kazuichi Maruyama<sup>8</sup>, Kazuko Omodaka<sup>1,2</sup>, Yukihiro Shiga<sup>1</sup>, Akira Uruno<sup>4</sup>, Seizo Koshiba<sup>3,4</sup>, Masayuki Yamamoto<sup>3</sup>, Toru Nakazawa<sup>1,2,6,9,\*</sup>

1 Department of Ophthalmology, Tohoku University Graduate School of Medicine, Miyagi, Japan

2 Department of Ophthalmic imaging and information analytics, Tohoku University Graduate School of Medicine, Miyagi, Japan

3 Department of Integrative Genomics, Tohoku Medical Megabank Organization, Tohoku University, Sendai, Miyagi, Japan,

4 Medical Biochemistry, Tohoku University School of Medicine, Sendai, Miyagi, Japan

5 CREST, Japan Agency for Medical Research and Development (AMED), Chiyoda, Tokyo, Japan

6 Department of Advanced Ophthalmic Medicine, Tohoku University Graduate School of Medicine, Miyagi, Japan

7 Department of Systems Bioinformatics, Graduate School of Information Sciences, Tohoku University, Sendai, Miyagi, Japan

8 Department of Innovative Visual Science, Graduate School of Medicine, Osaka University, Japan

9 Department of Retinal Disease Control, Tohoku University Graduate School of Medicine, Miyagi, Japan

a K. Sato and D. Saigusa contributed equally to this work.

Correspondence to: Toru Nakazawa, Department of Ophthalmology, Tohoku University Graduate School of Medicine, 1-1, Seiryō, Aoba, Sendai, Miyagi 980-8574, Japan; Phone; +81 22 717 7294; Fax: +81 22 717 7298; E-mail: ntoru@oph.med.tohoku.ac.jp (T. Nakazawa).

### Supplementary Figure 1

Distribution of representative metabolites (listed in Fig. 2), as identified with G-Met assays. The level of the following metabolites was not significant in the retinas of the NC day 2 group, as measured with imaging mass spectrometry (IMS) assays: (a) m/z 136.06, m/z 258.11, m/z 268.10 for adenine, glycerophosphocholine, adenosine; (b) m/z 520.33, LPC 18:2; and (c) m/z 723.49, phosphatidylglycerol 32:0. A, B, and C are microscopic images showing hematoxylin-eosin staining of cryosections of the eyes (x 2.5), with the retinal area around the optic disk at higher magnification (x 20). These images were obtained after IMS. Relative intensities are shown by the colored scale bar on the left side of the IMS data.

### Supplementary Table 1

List of features that differed significantly in the OPLS-DA data between the control and NC groups, as measured with an LC-MS assay.

Supplementary Figure 1

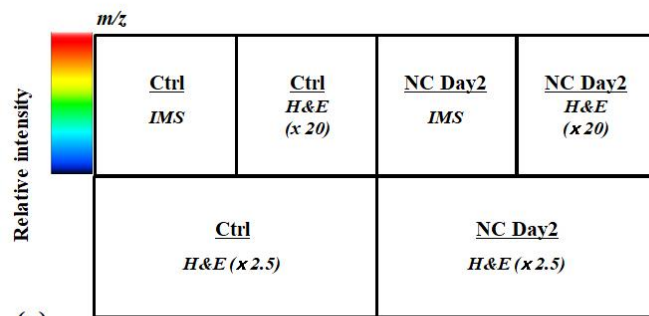

(a)

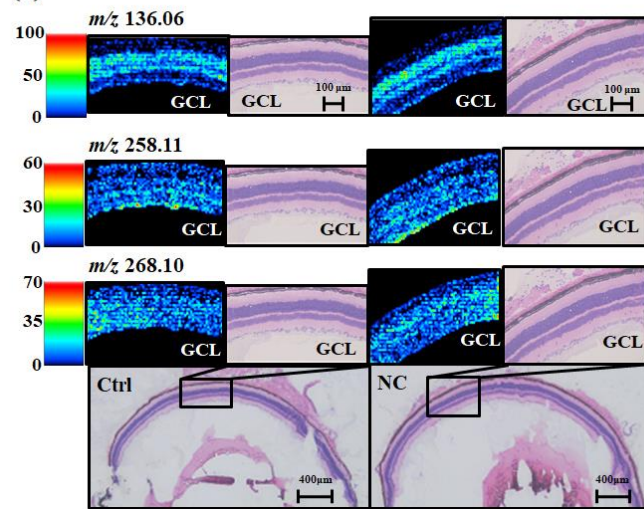

(b)

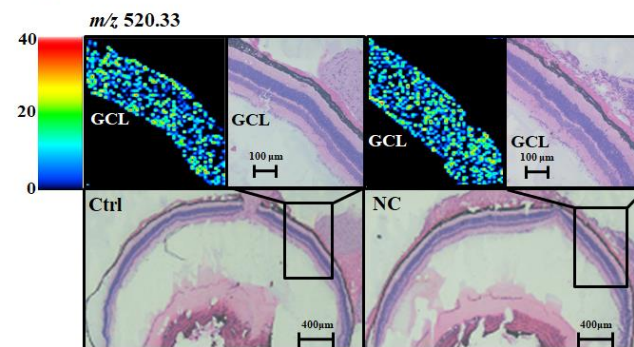

(c)

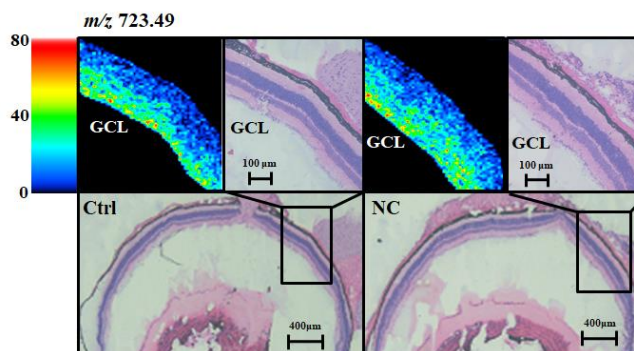

Supplementary Table 1

| Analytical Mode: C18 column-positive ion mode |           |         |            |                |           |          |            |
|-----------------------------------------------|-----------|---------|------------|----------------|-----------|----------|------------|
| High in NC Day2                               |           |         |            | Low in NC Day2 |           |          |            |
| Retention Time                                | m/z       | p[1]    | p(corr)[1] | Retention Time | m/z       | p[1]     | p(corr)[1] |
| 0.717                                         | 480.8342  | 0.03371 | 0.61717    | 0.696          | 378.9002  | -0.06626 | -0.64979   |
| 0.717                                         | 666.8230  | 0.04165 | 0.72154    | 0.703          | 446.8876  | -0.08935 | -0.62980   |
| 0.717                                         | 986.6923  | 0.06366 | 0.68499    | 0.703          | 396.8731  | -0.07664 | -0.68492   |
| 0.724                                         | 646.7582  | 0.07378 | 0.74340    | 0.703          | 868.7158  | -0.06927 | -0.68793   |
| 0.724                                         | 866.6946  | 0.04192 | 0.67380    | 0.710          | 106.9509  | -0.07121 | -0.61226   |
| 0.724                                         | 494.8095  | 0.09219 | 0.70569    | 0.710          | 598.8363  | -0.06107 | -0.61275   |
| 0.724                                         | 578.7709  | 0.06090 | 0.71697    | 0.710          | 174.9383  | -0.03342 | -0.63317   |
| 0.724                                         | 798.7089  | 0.04740 | 0.69098    | 0.710          | 1054.6769 | -0.07489 | -0.66828   |
| 0.724                                         | 496.8081  | 0.04065 | 0.66009    | 0.710          | 310.9129  | -0.07520 | -0.67020   |
| 0.724                                         | 530.8484  | 0.04103 | 0.68294    | 0.717          | 90.9772   | -0.06874 | -0.67463   |
| 0.731                                         | 614.8100  | 0.02462 | 0.60072    | 0.724          | 730.7205  | -0.06074 | -0.62958   |
| 0.731                                         | 882.6704  | 0.03893 | 0.75690    | 0.724          | 122.9249  | -0.03822 | -0.64352   |
| 0.731                                         | 580.7697  | 0.04976 | 0.71344    | 0.724          | 342.8609  | -0.07914 | -0.65199   |
| 0.731                                         | 512.7820  | 0.03609 | 0.62666    | 0.724          | 276.8717  | -0.06184 | -0.66236   |
| 0.731                                         | 950.6571  | 0.04818 | 0.74060    | 0.724          | 274.8734  | -0.06459 | -0.68454   |
| 0.731                                         | 662.7330  | 0.04536 | 0.74537    | 0.724          | 834.7453  | -0.06151 | -0.68738   |
| 0.731                                         | 208.8843  | 0.04941 | 0.62138    | 0.731          | 290.8472  | -0.06698 | -0.63342   |
| 0.731                                         | 632.7839  | 0.07629 | 0.73759    | 0.817          | 539.0218  | -0.03976 | -0.67022   |
| 0.738                                         | 526.7576  | 0.06250 | 0.75967    | 0.824          | 876.1099  | -0.06946 | -0.62609   |
| 0.746                                         | 104.1074  | 0.04227 | 0.66858    | 0.824          | 663.5968  | -0.03207 | -0.72973   |
| 0.753                                         | 175.1194  | 0.03013 | 0.64855    | 0.873          | 160.0959  | -0.14655 | -0.55199   |
| 0.753                                         | 399.1446  | 0.03502 | 0.61828    | 6.870          | 566.9315  | -0.12519 | -0.59673   |
| 0.760                                         | 170.0926  | 0.02743 | 0.61568    | 6.933          | 589.8139  | -0.13850 | -0.57931   |
| 0.788                                         | 104.0711  | 0.04098 | 0.69852    | 6.969          | 170.1546  | -0.19690 | -0.65919   |
| 0.810                                         | 233.1499  | 0.03003 | 0.66063    | 7.083          | 334.7624  | -0.21148 | -0.66092   |
| 0.817                                         | 637.5726  | 0.03792 | 0.75834    | 7.431          | 284.0941  | -0.20697 | -0.64611   |
| 0.824                                         | 1039.0814 | 0.02749 | 0.65848    | 7.474          | 283.1531  | -0.07227 | -0.64722   |
| 0.853                                         | 515.2130  | 0.26726 | 0.84119    | 7.502          | 351.1795  | -0.13165 | -0.62918   |
| 0.873                                         | 159.0768  | 0.02386 | 0.66496    | 8.989          | 161.0968  | -0.04054 | -0.67983   |
| 0.873                                         | 205.0684  | 0.02277 | 0.67736    | 8.996          | 267.1945  | -0.09448 | -0.74995   |
| 0.888                                         | 235.1656  | 0.03463 | 0.64504    | 9.131          | 290.1606  | -0.10236 | -0.60661   |
| 0.931                                         | 315.1433  | 0.06445 | 0.77340    | 9.160          | 214.1623  | -0.11019 | -0.62140   |
| 0.931                                         | 90.0554   | 0.02683 | 0.70558    | 9.160          | 329.0054  | -0.13379 | -0.64264   |
| 0.945                                         | 177.9927  | 0.12128 | 0.75894    | 9.195          | 370.3319  | -0.13557 | -0.62996   |
| 0.952                                         | 489.0456  | 0.14579 | 0.75986    | 9.223          | 338.2672  | -0.12590 | -0.60611   |
| 0.966                                         | 272.9255  | 0.02927 | 0.71583    | 9.273          | 235.1328  | -0.11067 | -0.60457   |
| 0.981                                         | 398.9771  | 0.05943 | 0.78474    | 9.280          | 413.4106  | -0.09191 | -0.63424   |
| 1.044                                         | 457.9582  | 0.04211 | 0.67832    | 9.330          | 399.1232  | -0.09867 | -0.59157   |
| 1.087                                         | 251.9499  | 0.16478 | 0.83749    | 9.330          | 289.0440  | -0.09935 | -0.59365   |
| 10.198                                        | 297.2446  | 0.09067 | 0.71869    | 11.229         | 496.4210  | -0.09840 | -0.68318   |
|                                               |           |         |            | 11.379         | 333.2767  | -0.11020 | -0.59742   |
